# Supplementary material for: Shaping the future of temperate forests in Europe: why outdoor recreation matters
Source: Research Square preprint supplement (doi:10.21203/rs.3.rs-841881/v1), 2021-08-26
Supplement: Supplementary file 1 [file 70a24ac7b26bbb0f4e0e8533.docx]

**Supplementary Materials**

**Figure S 1: Example of a choice task**

**Which of these two forests would you visit?**

| **Forest A** | **Forest B** | **Last visited forest** |
| --- | --- | --- |
| Mix of coniferous and broadleaved tree species, multi-aged, tallest trees 24 m, medium amount of trees left for natural decay | Mix of broadleaved tree species, two age classes, tallest trees 24 m, low amount of trees left for natural decay | [drawing and content corresponding to it based on part 1] |
| **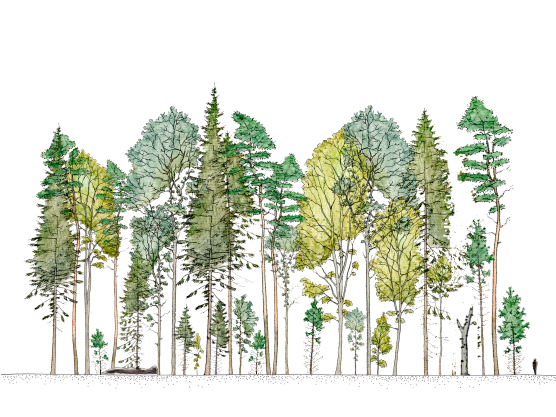** | **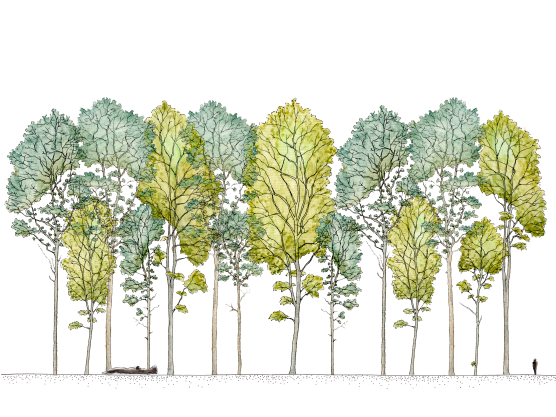** |
| [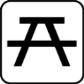](http://veraxproducts.com/) | [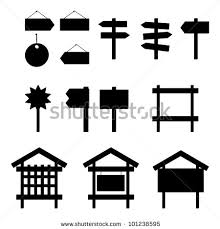](http://www.google.dk/url?sa=i&rct=j&q=&esrc=s&frm=1&source=images&cd=&cad=rja&uact=8&ved=0CAcQjRw&url=http://www.shutterstock.com/s/direction+sign/search.html&ei=shZ-VKytGarNygPYgoHgAw&bvm=bv.80642063,d.bGQ&psig=AFQjCNHnqg6Wd33UW4xbjApDl4HGNaJG4g&ust=1417635828049277) |
| **21 km** | **6 km** |

**Table S 1. Proportion of respondents carrying out the following activities during their last forest visit (picking more than one was possible)**

| Country | Walking | Hiking | Dog | Nature | Sport | Mushroom | Children |
| --- | --- | --- | --- | --- | --- | --- | --- |
| AUT | 0.51 | 0.31 | 0.20 | 0.65 | 0.08 | 0.14 | 0.11 |
| BLR | 0.17 | 0.03 | 0.06 | 0.29 | 0.06 | 0.53 | 0.12 |
| CHE | 0.53 | 0.19 | 0.22 | 0.57 | 0.19 | 0.06 | 0.14 |
| CZE | 0.33 | 0.41 | 0.19 | 0.49 | 0.10 | 0.48 | 0.18 |
| DEU | 0.50 | 0.27 | 0.22 | 0.63 | 0.12 | 0.14 | 0.09 |
| DNK | 0.38 | 0.17 | 0.24 | 0.63 | 0.13 | 0.07 | 0.09 |
| FRA | 0.43 | 0.29 | 0.24 | 0.60 | 0.11 | 0.21 | 0.15 |
| POL | 0.66 | 0.14 | 0.16 | 0.59 | 0.24 | 0.27 | 0.13 |
| SVK | 0.35 | 0.35 | 0.18 | 0.72 | 0.08 | 0.38 | 0.16 |
| SCO | 0.46 | 0.13 | 0.31 | 0.54 | 0.08 | 0.04 | 0.18 |

Note: AUT: Austria; BLR: Belarus; CHE: Switzerland; CZE: Czech Republic; DEU: Germany; DNK: Denmark; FRA: France; POL: Poland; SVK: Slovakia; SCO: Scotland

**Table S 2. Descriptive statistics of TCM sample**

|  | **AUT** | **BLR** | **CHE** | **CZE** | **DEU** | **DNK** | **FRA** | **POL** | **SVK** | **SCO** |
| --- | --- | --- | --- | --- | --- | --- | --- | --- | --- | --- |
| TCM - sample size | **553** | **413** | **625** | **523** | **585** | **619** | **623** | **585** | **576** | **554** |
| N - weekday | 182 | 62 | 250 | 152 | 164 | 273 | 190 | 164 | 158 | 227 |
| N - weekends/holiday | 371 | 351 | 375 | 371 | 421 | 346 | 433 | 421 | 418 | 327 |
| Share of respondents who didn't report income | 0.24 | 0.21 | 0.22 | 0.15 | 0.10 | 0.19 | 0.04 | 0.16 | 0.14 | 0.12 |
| VTT (1/3 wage rate in EUR, 2017) | 8.6 | 0.7 | 16.3 | 2.3 | 9.2 | 13.4 | 8.2 | 1.8 | 2.3 | 8.2 |
| Share of respondents who walked to the forest (VTT=0) | 0.40 | 0.15 | 0.55 | 0.39 | 0.34 | 0.35 | 0.18 | 0.22 | 0.37 | 0.16 |
| Share of respondents who biked to the forest (VTT=0) | 0.05 | 0.09 | 0.07 | 0.04 | 0.07 | 0.08 | 0.05 | 0.20 | 0.06 | 0.03 |
| Share of men | 0.47 | 0.48 | 0.50 | 0.52 | 0.52 | 0.49 | 0.52 | 0.51 | 0.52 | 0.52 |
| Age (in years) | 44.3 | 43.3 | 44.5 | 46.6 | 46.8 | 51.0 | 46.6 | 42.7 | 42.8 | 50.1 |
| Municipality size |  |  |  |  |  |  |  |  |  |  |
| Rural | 0.13 | 0.22 | 0.07 | 0.42 | 0.11 | 0.20 | 0.18 | 0.26 | 0.48 | 0.29 |
| up to 100k | 0.48 | 0.23 | 0.66 | 0.18 | 0.38 | 0.38 | 0.45 | 0.19 | 0.16 | 0.18 |
| 100k-500k | 0.10 | 0.11 | 0.14 | 0.21 | 0.21 | 0.25 | 0.20 | 0.33 | 0.26 | 0.28 |
| >500k | 0.29 | 0.44 | 0.13 | 0.19 | 0.29 | 0.18 | 0.18 | 0.22 | 0.10 | 0.24 |
|  |  |  |  |  |  |  |  |  |  |  |
| Share of respondents with higher education | 0.46 | 0.33 | 0.71 | 0.53 | 0.61 | 0.52 | 0.52 | 0.68 | 0.49 | 0.55 |

Note: AUT: Austria; BLR: Belarus; CHE: Switzerland; CZE: Czech Republic; DEU: Germany; DNK: Denmark; FRA: France; POL: Poland; SVK: Slovakia; SCO: Scotland

**Table S 3. Share of respondents who visited forest in the last 12 months**

|  | **AUT** | **BLR** | **CHE** | **CZE** | **DEU** | **DNK** | **FRA** | **POL** | **SVK** | **SCO** |
| --- | --- | --- | --- | --- | --- | --- | --- | --- | --- | --- |
| population18+ (in 1,000’s) | 7279.85 | 7652.97 | 6942.08 | 8692.81 | 69073.56 | 4606.28 | 52309.97 | 31255.95 | 4445.70 | 4394.75 |
| % of respondents who visited forest in the last 12 months | 85.68% | 79.35% | 90.45% | 86.86% | 75.40% | 84.12% | 74.28% | 90.50% | 81.46% | 71.19% |
| population18+ adjusted (in 1,000’s) | 6237.37 | 6072.63 | 6279.11 | 7550.57 | 52081.46 | 3874.81 | 38855.85 | 28286.64 | 3621.46 | 3128.62 |

**Table S 4. Distance levels in DCE**

The distance levels used in DCE were based on the answers to Q25

**Q25. Please indicate the approximate distance ❨one way❩ which you travelled to reach this forest from the departure point.**

- 1. Less than 1 km
  2. 1-4
  3. 5-9 km
  4. 10-19 km
  5. 20-39 km
  6. 40-69 km
  7. 70-99 km
  8. 100-149 km
  9. 150-199 km
  10. More than 200

| **Short (a-b)** | **Medium short (c-d)** | **Medium (e - f)** | **Medium long (g - h)** | **Long (i - j)** |
| --- | --- | --- | --- | --- |
| 1 | 1 | 1 | 5 | 5 |
| 2 | 2 | 5 | 10 | 10 |
| 4 | 5 | 10 | 20 | 20 |
| 6 | 10 | 20 | 30 | 40 |
| 10 | 15 | 30 | 40 | 80 |
| 12 | 20 | 40 | 50 | 100 |
| 15 | 25 | 50 | 70 | 150 |
| 20 | 50 | 70 | 100 | 200 |

**Table S 5. Descriptive statistics of DCE sample**

|  | **AUT** | **BLR** | **CHE** | **CZE** | **DEU** | **DNK** | **FRA** | **POL** | **SVK** | **SCO** |
| --- | --- | --- | --- | --- | --- | --- | --- | --- | --- | --- |
| DCE -sample size | 817 | 447 | 866 | 750 | 868 | 826 | 904 | 833 | 803 | 870 |
| % of Men | 49.9 | 46.5 | 51.3 | 49.9 | 51.4 | 50.4 | 50.8 | 49.2 | 49.3 | 51.4 |
| Age (years) | 41.5 | 41.0 | 41.1 | 43.6 | 43.4 | 48.4 | 44.3 | 40.5 | 41.0 | 48.0 |
| Rural | 11% | 24% | 7% | 39% | 10% | 18% | 15% | 24% | 46% | 26% |
| up to 100k | 41% | 19% | 64% | 18% | 35% | 37% | 42% | 17% | 16% | 17% |
| 100k-500k | 9% | 11% | 15% | 22% | 21% | 24% | 22% | 33% | 26% | 28% |
| >500k | 38% | 46% | 14% | 21% | 34% | 22% | 21% | 26% | 12% | 29% |
| % with a higher education | 28.1 | 36.1 | 30.2 | 25.1 | 29.0 | 33.4 | 53.6 | 19.2 | 19.7 | 56.1 |

**Table S 6. How well the build forest resembles the visited one (range 0-100)**

| **AUT** | **BLR** | **CHE** | **CZE** | **DEU** | **DNK** | **FRA** | **POL** | **SVK** | **SCO** |
| --- | --- | --- | --- | --- | --- | --- | --- | --- | --- |
| 74.7 | 76.9 | 75.4 | 74.4 | 76.8 | 73.7 | 73.0 | 76.0 | 70.8 | 75.1 |

**Table S 7. Parameter estimates from DCE by country**

| Austria (AT) | |  |  |  |  |  |  |  |  |  |  |
| --- | --- | --- | --- | --- | --- | --- | --- | --- | --- | --- | --- |
|  |  | MMNL | in WTP-space | |  |  |  |  |  |  |  |
|  |  |  |  | Means |  |  |  | Standard Deviations | |  |  |
|  |  | var. | dist. | coef. | sign. | st.err. | p-value | coef. | sign. | st.err. | p-value |
|  |  | ASC - last visited forest | n | 4.0913 | *** | 0.0475 | 0.0000 | 4.3805 | *** | 0.0483 | 0.0000 |
|  |  | Monoculture broadleaf (vs. mono. conif.) | n | -0.5410 | *** | 0.0959 | 0.0000 | 0.8540 | *** | 0.0972 | 0.0000 |
|  |  | 2 species conif. (vs. mono. conif.) | n | 0.0468 |  | 0.0775 | 0.5457 | 0.5736 | *** | 0.0782 | 0.0000 |
|  |  | 2 species broad. (vs. mono. conif.) | n | 0.1117 |  | 0.0935 | 0.2321 | 1.1021 | *** | 0.0564 | 0.0000 |
|  |  | 2 species mix. (vs. mono. conif.) | n | 0.6181 | *** | 0.0708 | 0.0000 | 0.6387 | *** | 0.0402 | 0.0000 |
|  |  | 3 species mix. (vs. mono. conif.) | n | 1.3502 | *** | 0.0776 | 0.0000 | 1.1921 | *** | 0.0543 | 0.0000 |
|  |  | 4 species mix. (vs. mono. conif.) | n | 0.6549 | *** | 0.0804 | 0.0000 | 1.4102 | *** | 0.0283 | 0.0000 |
|  |  | Tree height 18 (vs. 8) | n | -0.1700 | *** | 0.0532 | 0.0014 | 2.0697 | *** | 0.0298 | 0.0000 |
|  |  | Tree height 24 (vs. 8) | n | 1.5275 | *** | 0.0604 | 0.0000 | 1.1195 | *** | 0.0392 | 0.0000 |
|  |  | Two-aged vs. single aged | n | -0.0975 |  | 0.0652 | 0.1348 | 1.8441 | *** | 0.0426 | 0.0000 |
|  |  | Multi-aged vs. single aged | n | 0.2650 | *** | 0.0628 | 0.0000 | 1.4206 | *** | 0.0419 | 0.0000 |
|  |  | Medium vs. low amount of deadwood | n | 0.6616 | *** | 0.0503 | 0.0000 | 1.0606 | *** | 0.0274 | 0.0000 |
|  |  | High vs. low amount of deadwood | n | 0.3244 | *** | 0.0559 | 0.0000 | 0.8545 | *** | 0.0230 | 0.0000 |
|  |  | Picnic vs. no facilities | n | -0.7118 | *** | 0.0831 | 0.0000 | 1.6739 | *** | 0.0462 | 0.0000 |
|  |  | Trails vs. no facilities | n | 0.7271 | *** | 0.0589 | 0.0000 | 1.9955 | *** | 0.0354 | 0.0000 |
|  |  | Picnic and trails vs. no facilities | n | 0.9067 | *** | 0.0562 | 0.0000 | 1.8075 | *** | 0.0335 | 0.0000 |
|  |  | - Distance (10 km) | l | 1.4505 | *** | 0.1152 | 0.0000 | 2.7706 | *** | 0.1431 | 0.0000 |
|  |  |  |  |  |  |  |  |  |  |  |  |
|  |  | Model diagnostics |  |  |  |  |  |  |  |  |  |
|  |  | LL at convergence | -4940.77 | |  |  |  |  |  |  |  |
|  |  | LL at constant(s) only | -7787.68 | |  |  |  |  |  |  |  |
|  |  | McFadden's pseudo-R² | 0.3656 | |  |  |  |  |  |  |  |
|  |  | Ben-Akiva-Lerman's pseudo-R² | 0.7388 | |  |  |  |  |  |  |  |
|  |  | AIC/*n* | 1.0426 | |  |  |  |  |  |  |  |
|  |  | BIC/*n* | 1.1673 | |  |  |  |  |  |  |  |
|  |  | *n* (observations) | 9804 | |  |  |  |  |  |  |  |
|  |  | *r* (respondents) | 817 | |  |  |  |  |  |  |  |
|  |  | *k* (parameters) | 170 | |  |  |  |  |  |  |  |
|  |  |  |  |  |  |  |  |  |  |  |  |
|  |  | Estimation method | weighted simulated maximum likelihood | | | |  |  |  |  |  |
|  |  | Simulation with | 1000 Sobol draws with random linear scramble and random digital shift (skip = 1; leap = 0) | | | | | | | | |
|  |  | Optimization method | quasi-newton | |  |  |  |  |  |  |  |
|  |  | Gradient | user-supplied, analytical | | |  |  |  |  |  |  |
|  |  | Hessian | off, retained from optimization | | | |  |  |  |  |  |
|  |  |  |  |  |  |  |  |  |  |  |  |
|  |  |  |  |  |  |  |  |  |  |  |  |
|  |  |  |  |  |  |  |  |  |  |  |  |
|  |  |  |  |  |  |  |  |  |  |  |  |

| **Belarus (BY)** | |  |  |  |  |  |  |  |  |  |  |
| --- | --- | --- | --- | --- | --- | --- | --- | --- | --- | --- | --- |
|  |  | MMNL | in WTP-space | |  |  |  |  |  |  |  |
|  |  |  |  | Means |  |  |  | Standard Deviations | |  |  |
|  |  | var. | dist. | coef. | sign. | st.err. | p-value | coef. | sign. | st.err. | p-value |
|  |  | ASC - last visited forest | n | 2.2196 | *** | 0.0382 | 0.0000 | 5.8296 | *** | 0.0645 | 0.0000 |
|  |  | Monoculture broadleaf (vs. mono. conif.) | n | -0.0522 |  | 0.0466 | 0.2627 | 0.3934 | *** | 0.0439 | 0.0000 |
|  |  | 2 species conif. (vs. mono. conif.) | n | -0.1525 | *** | 0.0471 | 0.0012 | 0.1504 | *** | 0.0569 | 0.0082 |
|  |  | 2 species broad. (vs. mono. conif.) | n | -0.6187 | *** | 0.0926 | 0.0000 | 1.1840 | *** | 0.0938 | 0.0000 |
|  |  | 2 species mix. (vs. mono. conif.) | n | 0.1125 | ** | 0.0517 | 0.0296 | 1.0558 | *** | 0.0576 | 0.0000 |
|  |  | 3 species mix. (vs. mono. conif.) | n | 0.4535 | *** | 0.0568 | 0.0000 | 0.9402 | *** | 0.0685 | 0.0000 |
|  |  | 4 species mix. (vs. mono. conif.) | n | 0.4039 | *** | 0.0641 | 0.0000 | 1.2063 | *** | 0.0528 | 0.0000 |
|  |  | Tree height 18 (vs. 8) | n | 0.3729 | *** | 0.0865 | 0.0000 | 1.8320 | *** | 0.0469 | 0.0000 |
|  |  | Tree height 24 (vs. 8) | n | 1.2068 | *** | 0.0990 | 0.0000 | 1.0813 | *** | 0.0631 | 0.0000 |
|  |  | Two-aged vs. single aged | n | -0.0853 |  | 0.0858 | 0.3202 | 1.6124 | *** | 0.0334 | 0.0000 |
|  |  | Multi-aged vs. single aged | n | 0.0394 |  | 0.0888 | 0.6570 | 1.8382 | *** | 0.0369 | 0.0000 |
|  |  | Medium vs. low amount of deadwood | n | 0.0213 |  | 0.0674 | 0.7525 | 1.0851 | *** | 0.0420 | 0.0000 |
|  |  | High vs. low amount of deadwood | n | -0.2124 | *** | 0.0615 | 0.0006 | 0.8961 | *** | 0.0283 | 0.0000 |
|  |  | Picnic vs. no facilities | n | 0.6581 | *** | 0.0806 | 0.0000 | 1.8601 | *** | 0.0346 | 0.0000 |
|  |  | Trails vs. no facilities | n | 0.9113 | *** | 0.0966 | 0.0000 | 1.4041 | *** | 0.0295 | 0.0000 |
|  |  | Picnic and trails vs. no facilities | n | 1.8723 | *** | 0.1007 | 0.0000 | 1.3827 | *** | 0.0305 | 0.0000 |
|  |  | - Distance (10 km) | l | 0.5389 | *** | 0.1470 | 0.0002 | 5.4981 | *** | 0.4911 | 0.0000 |
|  |  |  |  |  |  |  |  |  |  |  |  |
|  |  | Model diagnostics |  |  |  |  |  |  |  |  |  |
|  |  | LL at convergence | -4064.01 | |  |  |  |  |  |  |  |
|  |  | LL at constant(s) only | -5668.56 | |  |  |  |  |  |  |  |
|  |  | McFadden's pseudo-R² | 0.2831 | |  |  |  |  |  |  |  |
|  |  | Ben-Akiva-Lerman's pseudo-R² | 0.5971 | |  |  |  |  |  |  |  |
|  |  | AIC/*n* | 1.5787 | |  |  |  |  |  |  |  |
|  |  | BIC/*n* | 1.7875 | |  |  |  |  |  |  |  |
|  |  | *n* (observations) | 5364 | |  |  |  |  |  |  |  |
|  |  | *r* (respondents) | 447 | |  |  |  |  |  |  |  |
|  |  | *k* (parameters) | 170 | |  |  |  |  |  |  |  |
|  |  |  |  |  |  |  |  |  |  |  |  |
|  |  | Estimation method | weighted simulated maximum likelihood | | | |  |  |  |  |  |
|  |  | Simulation with | 1000 Sobol draws with random linear scramble and random digital shift (skip = 1; leap = 0) | | | | | | | | |
|  |  | Optimization method | quasi-newton | |  |  |  |  |  |  |  |
|  |  | Gradient | user-supplied, analytical | | |  |  |  |  |  |  |
|  |  | Hessian | off, retained from optimization | | | |  |  |  |  |  |
|  |  |  |  |  |  |  |  |  |  |  |  |
|  |  |  |  |  |  |  |  |  |  |  |  |
|  |  |  |  |  |  |  |  |  |  |  |  |
|  |  |  |  |  |  |  |  |  |  |  |  |
|  |  |  |  |  |  |  |  |  |  |  |  |
|  |  |  |  |  |  |  |  |  |  |  |  |
|  |  |  |  |  |  |  |  |  |  |  |  |
|  |  |  |  |  |  |  |  |  |  |  |  |

| **Switzerland (CH)** | |  |  |  |  |  |  |  |  |  |  |
| --- | --- | --- | --- | --- | --- | --- | --- | --- | --- | --- | --- |
|  |  | MMNL | in WTP-space | |  |  |  |  |  |  |  |
|  |  |  |  | Means |  |  |  | Standard Deviations | |  |  |
|  |  | var. | dist. | coef. | sign. | st.err. | p-value | coef. | sign. | st.err. | p-value |
|  |  | ASC - last visited forest | n | 2.1225 | *** | 0.0340 | 0.0000 | 2.3855 | *** | 0.0383 | 0.0000 |
|  |  | Monoculture broadleaf (vs. mono. conif.) | n | -0.0813 |  | 0.0523 | 0.1201 | 0.4106 | *** | 0.0261 | 0.0000 |
|  |  | 2 species conif. (vs. mono. conif.) | n | -0.3166 | *** | 0.0483 | 0.0000 | 0.4395 | *** | 0.0484 | 0.0000 |
|  |  | 2 species broad. (vs. mono. conif.) | n | -0.0389 |  | 0.0606 | 0.5203 | 0.8309 | *** | 0.0299 | 0.0000 |
|  |  | 2 species mix. (vs. mono. conif.) | n | 0.0785 | * | 0.0447 | 0.0793 | 0.3729 | *** | 0.0243 | 0.0000 |
|  |  | 3 species mix. (vs. mono. conif.) | n | 0.5139 | *** | 0.0468 | 0.0000 | 0.4123 | *** | 0.0397 | 0.0000 |
|  |  | 4 species mix. (vs. mono. conif.) | n | 0.8259 | *** | 0.0426 | 0.0000 | 0.9164 | *** | 0.0187 | 0.0000 |
|  |  | Tree height 18 (vs. 8) | n | -0.0896 | * | 0.0531 | 0.0919 | 1.1231 | *** | 0.0248 | 0.0000 |
|  |  | Tree height 24 (vs. 8) | n | 1.5992 | *** | 0.0633 | 0.0000 | 0.7204 | *** | 0.0406 | 0.0000 |
|  |  | Two-aged vs. single aged | n | -0.4336 | *** | 0.0413 | 0.0000 | 0.7476 | *** | 0.0204 | 0.0000 |
|  |  | Multi-aged vs. single aged | n | 0.0048 |  | 0.0329 | 0.8841 | 0.9119 | *** | 0.0245 | 0.0000 |
|  |  | Medium vs. low amount of deadwood | n | 0.4594 | *** | 0.0295 | 0.0000 | 0.4224 | *** | 0.0151 | 0.0000 |
|  |  | High vs. low amount of deadwood | n | 0.3011 | *** | 0.0287 | 0.0000 | 0.5781 | *** | 0.0171 | 0.0000 |
|  |  | Picnic vs. no facilities | n | 0.1329 | *** | 0.0374 | 0.0004 | 0.6981 | *** | 0.0216 | 0.0000 |
|  |  | Trails vs. no facilities | n | 0.1847 | *** | 0.0349 | 0.0000 | 0.8741 | *** | 0.0154 | 0.0000 |
|  |  | Picnic and trails vs. no facilities | n | 0.7832 | *** | 0.0427 | 0.0000 | 1.3320 | *** | 0.0249 | 0.0000 |
|  |  | - Distance (10 km) | l | 2.1621 | *** | 0.1352 | 0.0000 | 2.7765 | *** | 0.1486 | 0.0000 |
|  |  |  |  |  |  |  |  |  |  |  |  |
|  |  | Model diagnostics |  |  |  |  |  |  |  |  |  |
|  |  | LL at convergence | -4588.39 | |  |  |  |  |  |  |  |
|  |  | LL at constant(s) only | -7532.82 | |  |  |  |  |  |  |  |
|  |  | McFadden's pseudo-R² | 0.3909 | |  |  |  |  |  |  |  |
|  |  | Ben-Akiva-Lerman's pseudo-R² | 0.7720 | |  |  |  |  |  |  |  |
|  |  | AIC/*n* | 0.9159 | |  |  |  |  |  |  |  |
|  |  | BIC/*n* | 1.0345 | |  |  |  |  |  |  |  |
|  |  | *n* (observations) | 10391 | |  |  |  |  |  |  |  |
|  |  | *r* (respondents) | 866 | |  |  |  |  |  |  |  |
|  |  | *k* (parameters) | 170 | |  |  |  |  |  |  |  |
|  |  |  |  |  |  |  |  |  |  |  |  |
|  |  | Estimation method | weighted simulated maximum likelihood | | | |  |  |  |  |  |
|  |  | Simulation with | 1000 Sobol draws with random linear scramble and random digital shift (skip = 1; leap = 0) | | | | | | | | |
|  |  | Optimization method | quasi-newton | |  |  |  |  |  |  |  |
|  |  | Gradient | user-supplied, analytical | | |  |  |  |  |  |  |
|  |  | Hessian | off, retained from optimization | | | |  |  |  |  |  |
|  |  |  |  |  |  |  |  |  |  |  |  |
|  |  |  |  |  |  |  |  |  |  |  |  |
|  |  |  |  |  |  |  |  |  |  |  |  |
|  |  |  |  |  |  |  |  |  |  |  |  |
|  |  |  |  |  |  |  |  |  |  |  |  |
|  |  |  |  |  |  |  |  |  |  |  |  |
|  |  |  |  |  |  |  |  |  |  |  |  |
|  |  |  |  |  |  |  |  |  |  |  |  |

| **Czech Republic (CZ)** | |  |  |  |  |  |  |  |  |  |  |
| --- | --- | --- | --- | --- | --- | --- | --- | --- | --- | --- | --- |
|  |  | MMNL | in WTP-space | |  |  |  |  |  |  |  |
|  |  |  |  | Means |  |  |  | Standard Deviations | |  |  |
|  |  | var. | dist. | coef. | sign. | st.err. | p-value | coef. | sign. | st.err. | p-value |
|  |  | ASC - last visited forest | n | 3.9093 | *** | 0.0751 | 0.0000 | 5.6910 | *** | 0.0976 | 0.0000 |
|  |  | Monoculture broadleaf (vs. mono. conif.) | n | -1.1887 | *** | 0.2579 | 0.0000 | 0.5201 | *** | 0.1161 | 0.0000 |
|  |  | 2 species conif. (vs. mono. conif.) | n | -0.0014 |  | 0.1616 | 0.9933 | 1.5291 | *** | 0.0908 | 0.0000 |
|  |  | 2 species broad. (vs. mono. conif.) | n | -1.0295 | *** | 0.1626 | 0.0000 | 2.8955 | *** | 0.1127 | 0.0000 |
|  |  | 2 species mix. (vs. mono. conif.) | n | 0.8970 | *** | 0.1233 | 0.0000 | 0.7462 | *** | 0.0818 | 0.0000 |
|  |  | 3 species mix. (vs. mono. conif.) | n | 0.2490 | ** | 0.1233 | 0.0435 | 1.2363 | *** | 0.0682 | 0.0000 |
|  |  | 4 species mix. (vs. mono. conif.) | n | 1.6183 | *** | 0.1771 | 0.0000 | 1.6123 | *** | 0.0646 | 0.0000 |
|  |  | Tree height 18 (vs. 8) | n | 1.4797 | *** | 0.1611 | 0.0000 | 2.2796 | *** | 0.0672 | 0.0000 |
|  |  | Tree height 24 (vs. 8) | n | 2.5784 | *** | 0.1975 | 0.0000 | 1.5603 | *** | 0.1505 | 0.0000 |
|  |  | Two-aged vs. single aged | n | -0.4968 | *** | 0.1626 | 0.0023 | 1.3949 | *** | 0.1015 | 0.0000 |
|  |  | Multi-aged vs. single aged | n | -0.3326 | ** | 0.1600 | 0.0376 | 1.7915 | *** | 0.0925 | 0.0000 |
|  |  | Medium vs. low amount of deadwood | n | 0.3669 | *** | 0.0857 | 0.0000 | 1.4334 | *** | 0.0714 | 0.0000 |
|  |  | High vs. low amount of deadwood | n | -0.2622 | *** | 0.0969 | 0.0068 | 1.5399 | *** | 0.0860 | 0.0000 |
|  |  | Picnic vs. no facilities | n | -0.3857 | *** | 0.1308 | 0.0032 | 2.5057 | *** | 0.1010 | 0.0000 |
|  |  | Trails vs. no facilities | n | 0.4220 | *** | 0.1068 | 0.0001 | 2.4836 | *** | 0.0875 | 0.0000 |
|  |  | Picnic and trails vs. no facilities | n | 0.7804 | *** | 0.1353 | 0.0000 | 2.7963 | *** | 0.1089 | 0.0000 |
|  |  | - Distance (10 km) | l | 1.2857 | *** | 0.1179 | 0.0000 | 2.9148 | *** | 0.1674 | 0.0000 |
|  |  |  |  |  |  |  |  |  |  |  |  |
|  |  | Model diagnostics |  |  |  |  |  |  |  |  |  |
|  |  | LL at convergence | -4803.03 | |  |  |  |  |  |  |  |
|  |  | LL at constant(s) only | -7609.57 | |  |  |  |  |  |  |  |
|  |  | McFadden's pseudo-R² | 0.3688 | |  |  |  |  |  |  |  |
|  |  | Ben-Akiva-Lerman's pseudo-R² | 0.7377 | |  |  |  |  |  |  |  |
|  |  | AIC/*n* | 1.1057 | |  |  |  |  |  |  |  |
|  |  | BIC/*n* | 1.2400 | |  |  |  |  |  |  |  |
|  |  | *n* (observations) | 8995 | |  |  |  |  |  |  |  |
|  |  | *r* (respondents) | 750 | |  |  |  |  |  |  |  |
|  |  | *k* (parameters) | 170 | |  |  |  |  |  |  |  |
|  |  |  |  |  |  |  |  |  |  |  |  |
|  |  | Estimation method | weighted simulated maximum likelihood | | | |  |  |  |  |  |
|  |  | Simulation with | 1000 Sobol draws with random linear scramble and random digital shift (skip = 1; leap = 0) | | | | | | | | |
|  |  | Optimization method | quasi-newton | |  |  |  |  |  |  |  |
|  |  | Gradient | user-supplied, analytical | | |  |  |  |  |  |  |
|  |  | Hessian | off, retained from optimization | | | |  |  |  |  |  |
|  |  |  |  |  |  |  |  |  |  |  |  |
|  |  |  |  |  |  |  |  |  |  |  |  |
|  |  |  |  |  |  |  |  |  |  |  |  |
|  |  |  |  |  |  |  |  |  |  |  |  |
|  |  |  |  |  |  |  |  |  |  |  |  |
|  |  |  |  |  |  |  |  |  |  |  |  |
|  |  |  |  |  |  |  |  |  |  |  |  |
|  |  |  |  |  |  |  |  |  |  |  |  |

| **Germany (DE)** | |  |  |  |  |  |  |  |  |  |  |
| --- | --- | --- | --- | --- | --- | --- | --- | --- | --- | --- | --- |
|  |  | MMNL | in WTP-space | |  |  |  |  |  |  |  |
|  |  |  |  | Means |  |  |  | Standard Deviations | |  |  |
|  |  | var. | dist. | coef. | sign. | st.err. | p-value | coef. | sign. | st.err. | p-value |
|  |  | ASC - last visited forest | n | 2.9350 | *** | 0.0400 | 0.0000 | 3.9222 | *** | 0.0528 | 0.0000 |
|  |  | Monoculture broadleaf (vs. mono. conif.) | n | -0.1272 | * | 0.0730 | 0.0814 | 0.1192 | * | 0.0670 | 0.0752 |
|  |  | 2 species conif. (vs. mono. conif.) | n | -0.2834 | *** | 0.0719 | 0.0001 | 0.3567 | *** | 0.0376 | 0.0000 |
|  |  | 2 species broad. (vs. mono. conif.) | n | -0.1097 | * | 0.0657 | 0.0950 | 0.4906 | *** | 0.0467 | 0.0000 |
|  |  | 2 species mix. (vs. mono. conif.) | n | 0.2396 | *** | 0.0664 | 0.0003 | 0.5383 | *** | 0.0518 | 0.0000 |
|  |  | 3 species mix. (vs. mono. conif.) | n | 0.4583 | *** | 0.0671 | 0.0000 | 0.6139 | *** | 0.0519 | 0.0000 |
|  |  | 4 species mix. (vs. mono. conif.) | n | 0.6190 | *** | 0.0589 | 0.0000 | 0.7996 | *** | 0.0260 | 0.0000 |
|  |  | Tree height 18 (vs. 8) | n | 0.1712 | * | 0.0976 | 0.0794 | 1.5773 | *** | 0.0403 | 0.0000 |
|  |  | Tree height 24 (vs. 8) | n | 1.6620 | *** | 0.0930 | 0.0000 | 0.8116 | *** | 0.0629 | 0.0000 |
|  |  | Two-aged vs. single aged | n | 0.0172 |  | 0.0689 | 0.8033 | 1.4008 | *** | 0.0552 | 0.0000 |
|  |  | Multi-aged vs. single aged | n | 0.2401 | *** | 0.0650 | 0.0002 | 1.3776 | *** | 0.0591 | 0.0000 |
|  |  | Medium vs. low amount of deadwood | n | 0.3427 | *** | 0.0504 | 0.0000 | 0.5089 | *** | 0.0290 | 0.0000 |
|  |  | High vs. low amount of deadwood | n | 0.3391 | *** | 0.0532 | 0.0000 | 0.8026 | *** | 0.0343 | 0.0000 |
|  |  | Picnic vs. no facilities | n | -0.0367 |  | 0.0720 | 0.6099 | 0.9317 | *** | 0.0283 | 0.0000 |
|  |  | Trails vs. no facilities | n | 0.8108 | *** | 0.0487 | 0.0000 | 1.2666 | *** | 0.0258 | 0.0000 |
|  |  | Picnic and trails vs. no facilities | n | 0.7271 | *** | 0.0579 | 0.0000 | 1.3340 | *** | 0.0301 | 0.0000 |
|  |  | - Distance (10 km) | l | 2.0298 | *** | 0.1497 | 0.0000 | 2.8173 | *** | 0.1450 | 0.0000 |
|  |  |  |  |  |  |  |  |  |  |  |  |
|  |  | Model diagnostics |  |  |  |  |  |  |  |  |  |
|  |  | LL at convergence | -4435.47 | |  |  |  |  |  |  |  |
|  |  | LL at constant(s) only | -7479.14 | |  |  |  |  |  |  |  |
|  |  | McFadden's pseudo-R² | 0.4070 | |  |  |  |  |  |  |  |
|  |  | Ben-Akiva-Lerman's pseudo-R² | 0.7928 | |  |  |  |  |  |  |  |
|  |  | AIC/*n* | 0.8844 | |  |  |  |  |  |  |  |
|  |  | BIC/*n* | 1.0027 | |  |  |  |  |  |  |  |
|  |  | *n* (observations) | 10415 | |  |  |  |  |  |  |  |
|  |  | *r* (respondents) | 868 | |  |  |  |  |  |  |  |
|  |  | *k* (parameters) | 170 | |  |  |  |  |  |  |  |
|  |  |  |  |  |  |  |  |  |  |  |  |
|  |  | Estimation method | weighted simulated maximum likelihood | | | |  |  |  |  |  |
|  |  | Simulation with | 1000 Sobol draws with random linear scramble and random digital shift (skip = 1; leap = 0) | | | | | | | | |
|  |  | Optimization method | quasi-newton | |  |  |  |  |  |  |  |
|  |  | Gradient | user-supplied, analytical | | |  |  |  |  |  |  |
|  |  | Hessian | off, retained from optimization | | | |  |  |  |  |  |
|  |  |  |  |  |  |  |  |  |  |  |  |
|  |  |  |  |  |  |  |  |  |  |  |  |
|  |  |  |  |  |  |  |  |  |  |  |  |
|  |  |  |  |  |  |  |  |  |  |  |  |
|  |  |  |  |  |  |  |  |  |  |  |  |

| **Denmark (DK)** | |  |  |  |  |  |  |  |  |  |  |
| --- | --- | --- | --- | --- | --- | --- | --- | --- | --- | --- | --- |
|  |  | MMNL | in WTP-space | |  |  |  |  |  |  |  |
|  |  |  |  | Means |  |  |  | Standard Deviations | |  |  |
|  |  | var. | dist. | coef. | sign. | st.err. | p-value | coef. | sign. | st.err. | p-value |
|  |  | ASC - last visited forest | n | 1.3975 | *** | 0.0129 | 0.0000 | 1.2063 | *** | 0.0103 | 0.0000 |
|  |  | Monoculture broadleaf (vs. mono. conif.) | n | -0.0102 |  | 0.0244 | 0.6759 | 0.2709 | *** | 0.0132 | 0.0000 |
|  |  | 2 species conif. (vs. mono. conif.) | n | 0.1047 | *** | 0.0237 | 0.0000 | 0.3387 | *** | 0.0142 | 0.0000 |
|  |  | 2 species broad. (vs. mono. conif.) | n | 0.2783 | *** | 0.0235 | 0.0000 | 0.3375 | *** | 0.0110 | 0.0000 |
|  |  | 2 species mix. (vs. mono. conif.) | n | 0.4762 | *** | 0.0167 | 0.0000 | 0.3069 | *** | 0.0124 | 0.0000 |
|  |  | 3 species mix. (vs. mono. conif.) | n | 0.4544 | *** | 0.0185 | 0.0000 | 0.3294 | *** | 0.0066 | 0.0000 |
|  |  | 4 species mix. (vs. mono. conif.) | n | 0.6464 | *** | 0.0170 | 0.0000 | 0.4319 | *** | 0.0085 | 0.0000 |
|  |  | Tree height 18 (vs. 8) | n | 0.3430 | *** | 0.0193 | 0.0000 | 0.4400 | *** | 0.0103 | 0.0000 |
|  |  | Tree height 24 (vs. 8) | n | 0.5952 | *** | 0.0212 | 0.0000 | 0.3843 | *** | 0.0106 | 0.0000 |
|  |  | Two-aged vs. single aged | n | -0.1417 | *** | 0.0183 | 0.0000 | 0.4500 | *** | 0.0117 | 0.0000 |
|  |  | Multi-aged vs. single aged | n | 0.3550 | *** | 0.0163 | 0.0000 | 0.5267 | *** | 0.0069 | 0.0000 |
|  |  | Medium vs. low amount of deadwood | n | 0.1729 | *** | 0.0177 | 0.0000 | 0.3607 | *** | 0.0056 | 0.0000 |
|  |  | High vs. low amount of deadwood | n | 0.3206 | *** | 0.0177 | 0.0000 | 0.5231 | *** | 0.0084 | 0.0000 |
|  |  | Picnic vs. no facilities | n | -0.1572 | *** | 0.0156 | 0.0000 | 0.4136 | *** | 0.0083 | 0.0000 |
|  |  | Trails vs. no facilities | n | 0.0749 | *** | 0.0147 | 0.0000 | 0.6923 | *** | 0.0075 | 0.0000 |
|  |  | Picnic and trails vs. no facilities | n | 0.1826 | *** | 0.0185 | 0.0000 | 0.6762 | *** | 0.0065 | 0.0000 |
|  |  | - Distance (10 km) | l | 3.1460 | *** | 0.1665 | 0.0000 | 2.9234 | *** | 0.1663 | 0.0000 |
|  |  |  |  |  |  |  |  |  |  |  |  |
|  |  | Model diagnostics |  |  |  |  |  |  |  |  |  |
|  |  | LL at convergence | -4344.77 | |  |  |  |  |  |  |  |
|  |  | LL at constant(s) only | -7300.80 | |  |  |  |  |  |  |  |
|  |  | McFadden's pseudo-R² | 0.4049 | |  |  |  |  |  |  |  |
|  |  | Ben-Akiva-Lerman's pseudo-R² | 0.7934 | |  |  |  |  |  |  |  |
|  |  | AIC/*n* | 0.9110 | |  |  |  |  |  |  |  |
|  |  | BIC/*n* | 1.0345 | |  |  |  |  |  |  |  |
|  |  | *n* (observations) | 9912 | |  |  |  |  |  |  |  |
|  |  | *r* (respondents) | 826 | |  |  |  |  |  |  |  |
|  |  | *k* (parameters) | 170 | |  |  |  |  |  |  |  |
|  |  |  |  |  |  |  |  |  |  |  |  |
|  |  | Estimation method | weighted simulated maximum likelihood | | | |  |  |  |  |  |
|  |  | Simulation with | 1000 Sobol draws with random linear scramble and random digital shift (skip = 1; leap = 0) | | | | | | | | |
|  |  | Optimization method | quasi-newton | |  |  |  |  |  |  |  |
|  |  | Gradient | user-supplied, analytical | | |  |  |  |  |  |  |
|  |  | Hessian | off, retained from optimization | | | |  |  |  |  |  |
|  |  |  |  |  |  |  |  |  |  |  |  |
|  |  |  |  |  |  |  |  |  |  |  |  |
|  |  |  |  |  |  |  |  |  |  |  |  |
|  |  |  |  |  |  |  |  |  |  |  |  |
|  |  |  |  |  |  |  |  |  |  |  |  |
|  |  |  |  |  |  |  |  |  |  |  |  |
|  |  |  |  |  |  |  |  |  |  |  |  |
|  |  |  |  |  |  |  |  |  |  |  |  |

| **France (FR)** | |  |  |  |  |  |  |  |  |  |  |
| --- | --- | --- | --- | --- | --- | --- | --- | --- | --- | --- | --- |
|  |  | MMNL | in WTP-space | |  |  |  |  |  |  |  |
|  |  |  |  | Means |  |  |  | Standard Deviations | |  |  |
|  |  | var. | dist. | coef. | sign. | st.err. | p-value | coef. | sign. | st.err. | p-value |
|  |  | ASC - last visited forest | n | 3.0639 | *** | 0.0477 | 0.0000 | 4.9097 | *** | 0.0708 | 0.0000 |
|  |  | Monoculture broadleaf (vs. mono. conif.) | n | 0.3715 | *** | 0.0814 | 0.0000 | 0.7316 | *** | 0.1121 | 0.0000 |
|  |  | 2 species conif. (vs. mono. conif.) | n | 0.0587 |  | 0.1018 | 0.5646 | 0.9270 | *** | 0.0527 | 0.0000 |
|  |  | 2 species broad. (vs. mono. conif.) | n | 0.6102 | *** | 0.0725 | 0.0000 | 0.6872 | *** | 0.0410 | 0.0000 |
|  |  | 2 species mix. (vs. mono. conif.) | n | 0.8104 | *** | 0.0645 | 0.0000 | 0.9893 | *** | 0.0823 | 0.0000 |
|  |  | 3 species mix. (vs. mono. conif.) | n | 0.8881 | *** | 0.0727 | 0.0000 | 0.8668 | *** | 0.0642 | 0.0000 |
|  |  | 4 species mix. (vs. mono. conif.) | n | 1.7645 | *** | 0.0755 | 0.0000 | 1.2623 | *** | 0.0555 | 0.0000 |
|  |  | Tree height 18 (vs. 8) | n | 1.6451 | *** | 0.0890 | 0.0000 | 1.9123 | *** | 0.0370 | 0.0000 |
|  |  | Tree height 24 (vs. 8) | n | 3.0515 | *** | 0.1275 | 0.0000 | 1.5797 | *** | 0.0843 | 0.0000 |
|  |  | Two-aged vs. single aged | n | 0.1791 |  | 0.1106 | 0.1054 | 1.7161 | *** | 0.0746 | 0.0000 |
|  |  | Multi-aged vs. single aged | n | 0.8490 | *** | 0.1090 | 0.0000 | 1.6592 | *** | 0.0940 | 0.0000 |
|  |  | Medium vs. low amount of deadwood | n | -0.2354 | ** | 0.1056 | 0.0258 | 0.7572 | *** | 0.0426 | 0.0000 |
|  |  | High vs. low amount of deadwood | n | 0.3184 | *** | 0.1000 | 0.0015 | 0.6188 | *** | 0.0260 | 0.0000 |
|  |  | Picnic vs. no facilities | n | -0.2082 | ** | 0.0869 | 0.0165 | 1.7612 | *** | 0.0636 | 0.0000 |
|  |  | Trails vs. no facilities | n | 1.3396 | *** | 0.0954 | 0.0000 | 1.4269 | *** | 0.0422 | 0.0000 |
|  |  | Picnic and trails vs. no facilities | n | 1.6801 | *** | 0.0982 | 0.0000 | 2.0365 | *** | 0.0432 | 0.0000 |
|  |  | - Distance (10 km) | l | 0.6333 | *** | 0.1008 | 0.0000 | 3.0733 | *** | 0.1337 | 0.0000 |
|  |  |  |  |  |  |  |  |  |  |  |  |
|  |  | Model diagnostics |  |  |  |  |  |  |  |  |  |
|  |  | LL at convergence | -6940.24 | |  |  |  |  |  |  |  |
|  |  | LL at constant(s) only | -9970.05 | |  |  |  |  |  |  |  |
|  |  | McFadden's pseudo-R² | 0.3039 | |  |  |  |  |  |  |  |
|  |  | Ben-Akiva-Lerman's pseudo-R² | 0.7105 | |  |  |  |  |  |  |  |
|  |  | AIC/*n* | 1.3112 | |  |  |  |  |  |  |  |
|  |  | BIC/*n* | 1.4255 | |  |  |  |  |  |  |  |
|  |  | *n* (observations) | 10845 | |  |  |  |  |  |  |  |
|  |  | *r* (respondents) | 904 | |  |  |  |  |  |  |  |
|  |  | *k* (parameters) | 170 | |  |  |  |  |  |  |  |
|  |  |  |  |  |  |  |  |  |  |  |  |
|  |  | Estimation method | weighted simulated maximum likelihood | | | |  |  |  |  |  |
|  |  | Simulation with | 1000 Sobol draws with random linear scramble and random digital shift (skip = 1; leap = 0) | | | | | | | | |
|  |  | Optimization method | quasi-newton | |  |  |  |  |  |  |  |
|  |  | Gradient | user-supplied, analytical | | |  |  |  |  |  |  |
|  |  | Hessian | off, retained from optimization | | | |  |  |  |  |  |
|  |  |  |  |  |  |  |  |  |  |  |  |
|  |  |  |  |  |  |  |  |  |  |  |  |
|  |  |  |  |  |  |  |  |  |  |  |  |
|  |  |  |  |  |  |  |  |  |  |  |  |
|  |  |  |  |  |  |  |  |  |  |  |  |
|  |  |  |  |  |  |  |  |  |  |  |  |
|  |  |  |  |  |  |  |  |  |  |  |  |
|  |  |  |  |  |  |  |  |  |  |  |  |

| **Poland (PL)** | |  |  |  |  |  |  |  |  |  |  |
| --- | --- | --- | --- | --- | --- | --- | --- | --- | --- | --- | --- |
|  |  | MMNL | in WTP-space | |  |  |  |  |  |  |  |
|  |  |  |  | Means |  |  |  | Standard Deviations | |  |  |
|  |  | var. | dist. | coef. | sign. | st.err. | p-value | coef. | sign. | st.err. | p-value |
|  |  | ASC - last visited forest | n | 3.9530 | *** | 0.0268 | 0.0000 | 5.1330 | *** | 0.0354 | 0.0000 |
|  |  | Monoculture broadleaf (vs. mono. conif.) | n | -0.3783 | *** | 0.0526 | 0.0000 | 0.1169 | ** | 0.0578 | 0.0431 |
|  |  | 2 species conif. (vs. mono. conif.) | n | 0.3397 | *** | 0.0451 | 0.0000 | 0.9992 | *** | 0.0376 | 0.0000 |
|  |  | 2 species broad. (vs. mono. conif.) | n | -0.5135 | *** | 0.0866 | 0.0000 | 2.0797 | *** | 0.0637 | 0.0000 |
|  |  | 2 species mix. (vs. mono. conif.) | n | 0.3914 | *** | 0.0537 | 0.0000 | 0.6746 | *** | 0.0453 | 0.0000 |
|  |  | 3 species mix. (vs. mono. conif.) | n | 0.7534 | *** | 0.0526 | 0.0000 | 0.6606 | *** | 0.0277 | 0.0000 |
|  |  | 4 species mix. (vs. mono. conif.) | n | 1.2863 | *** | 0.0643 | 0.0000 | 1.4206 | *** | 0.0232 | 0.0000 |
|  |  | Tree height 18 (vs. 8) | n | 1.4607 | *** | 0.0867 | 0.0000 | 1.9913 | *** | 0.0430 | 0.0000 |
|  |  | Tree height 24 (vs. 8) | n | 3.4068 | *** | 0.0959 | 0.0000 | 1.4780 | *** | 0.0524 | 0.0000 |
|  |  | Two-aged vs. single aged | n | -0.0879 |  | 0.0750 | 0.2416 | 1.5697 | *** | 0.0440 | 0.0000 |
|  |  | Multi-aged vs. single aged | n | 0.1590 | ** | 0.0632 | 0.0118 | 1.7972 | *** | 0.0319 | 0.0000 |
|  |  | Medium vs. low amount of deadwood | n | 0.2588 | *** | 0.0441 | 0.0000 | 0.8728 | *** | 0.0206 | 0.0000 |
|  |  | High vs. low amount of deadwood | n | 0.4235 | *** | 0.0500 | 0.0000 | 0.7644 | *** | 0.0245 | 0.0000 |
|  |  | Picnic vs. no facilities | n | 0.0100 |  | 0.0700 | 0.8867 | 2.4834 | *** | 0.0400 | 0.0000 |
|  |  | Trails vs. no facilities | n | 1.2038 | *** | 0.0712 | 0.0000 | 1.9155 | *** | 0.0417 | 0.0000 |
|  |  | Picnic and trails vs. no facilities | n | 1.7443 | *** | 0.0537 | 0.0000 | 2.4303 | *** | 0.0435 | 0.0000 |
|  |  | - Distance (10 km) | l | 0.8919 | *** | 0.0977 | 0.0000 | 3.6718 | *** | 0.1504 | 0.0000 |
|  |  |  |  |  |  |  |  |  |  |  |  |
|  |  | Model diagnostics |  |  |  |  |  |  |  |  |  |
|  |  | LL at convergence | -6321.51 | |  |  |  |  |  |  |  |
|  |  | LL at constant(s) only | -9341.09 | |  |  |  |  |  |  |  |
|  |  | McFadden's pseudo-R² | 0.3233 | |  |  |  |  |  |  |  |
|  |  | Ben-Akiva-Lerman's pseudo-R² | 0.6922 | |  |  |  |  |  |  |  |
|  |  | AIC/*n* | 1.2990 | |  |  |  |  |  |  |  |
|  |  | BIC/*n* | 1.4216 | |  |  |  |  |  |  |  |
|  |  | *n* (observations) | 9995 | |  |  |  |  |  |  |  |
|  |  | *r* (respondents) | 833 | |  |  |  |  |  |  |  |
|  |  | *k* (parameters) | 170 | |  |  |  |  |  |  |  |
|  |  |  |  |  |  |  |  |  |  |  |  |
|  |  | Estimation method | weighted simulated maximum likelihood | | | |  |  |  |  |  |
|  |  | Simulation with | 1000 Sobol draws with random linear scramble and random digital shift (skip = 1; leap = 0) | | | | | | | | |
|  |  | Optimization method | quasi-newton | |  |  |  |  |  |  |  |
|  |  | Gradient | user-supplied. analytical | | |  |  |  |  |  |  |
|  |  | Hessian | off. retained from optimization | | | |  |  |  |  |  |
|  |  |  |  |  |  |  |  |  |  |  |  |
|  |  |  |  |  |  |  |  |  |  |  |  |
|  |  |  |  |  |  |  |  |  |  |  |  |
|  |  |  |  |  |  |  |  |  |  |  |  |
|  |  |  |  |  |  |  |  |  |  |  |  |
|  |  |  |  |  |  |  |  |  |  |  |  |
|  |  |  |  |  |  |  |  |  |  |  |  |
|  |  |  |  |  |  |  |  |  |  |  |  |

| **Slovakia (SK)** | |  |  |  |  |  |  |  |  |  |  |
| --- | --- | --- | --- | --- | --- | --- | --- | --- | --- | --- | --- |
|  |  | MMNL | in WTP-space | |  |  |  |  |  |  |  |
|  |  |  |  | Means |  |  |  | Standard Deviations | |  |  |
|  |  | var. | dist. | coef. | sign. | st.err. | p-value | coef. | sign. | st.err. | p-value |
|  |  | ASC - last visited forest | n | 3.9338 | *** | 0.0970 | 0.0000 | 5.2484 | *** | 0.1147 | 0.0000 |
|  |  | Monoculture broadleaf (vs. mono. conif.) | n | -0.2045 |  | 0.1249 | 0.1016 | 1.0339 | *** | 0.1172 | 0.0000 |
|  |  | 2 species conif. (vs. mono. conif.) | n | 1.5001 | *** | 0.1375 | 0.0000 | 1.1075 | *** | 0.1942 | 0.0000 |
|  |  | 2 species broad. (vs. mono. conif.) | n | 0.5659 | *** | 0.1256 | 0.0000 | 1.8797 | *** | 0.0905 | 0.0000 |
|  |  | 2 species mix. (vs. mono. conif.) | n | 1.0260 | *** | 0.1160 | 0.0000 | 1.0963 | *** | 0.0992 | 0.0000 |
|  |  | 3 species mix. (vs. mono. conif.) | n | 2.0602 | *** | 0.1344 | 0.0000 | 1.3553 | *** | 0.1573 | 0.0000 |
|  |  | 4 species mix. (vs. mono. conif.) | n | 2.0003 | *** | 0.1705 | 0.0000 | 1.8555 | *** | 0.1114 | 0.0000 |
|  |  | Tree height 18 (vs. 8) | n | 2.7231 | *** | 0.1622 | 0.0000 | 2.9662 | *** | 0.1013 | 0.0000 |
|  |  | Tree height 24 (vs. 8) | n | 2.3211 | *** | 0.2101 | 0.0000 | 1.2109 | *** | 0.0862 | 0.0000 |
|  |  | Two-aged vs. single aged | n | 0.9239 | *** | 0.1708 | 0.0000 | 2.3095 | *** | 0.0964 | 0.0000 |
|  |  | Multi-aged vs. single aged | n | 1.9294 | *** | 0.1585 | 0.0000 | 2.7024 | *** | 0.1156 | 0.0000 |
|  |  | Medium vs. low amount of deadwood | n | 0.5205 | *** | 0.0895 | 0.0000 | 1.9461 | *** | 0.0634 | 0.0000 |
|  |  | High vs. low amount of deadwood | n | 0.1157 |  | 0.0896 | 0.1964 | 1.6411 | *** | 0.0519 | 0.0000 |
|  |  | Picnic vs. no facilities | n | 1.4448 | *** | 0.1315 | 0.0000 | 2.6970 | *** | 0.0857 | 0.0000 |
|  |  | Trails vs. no facilities | n | 1.6700 | *** | 0.1328 | 0.0000 | 1.9173 | *** | 0.0650 | 0.0000 |
|  |  | Picnic and trails vs. no facilities | n | 2.4027 | *** | 0.1302 | 0.0000 | 3.3755 | *** | 0.0991 | 0.0000 |
|  |  | - Distance (10 km) | l | 0.4426 | *** | 0.0907 | 0.0000 | 2.6946 | *** | 0.1403 | 0.0000 |
|  |  |  |  |  |  |  |  |  |  |  |  |
|  |  | Model diagnostics |  |  |  |  |  |  |  |  |  |
|  |  | LL at convergence | -6312.14 | |  |  |  |  |  |  |  |
|  |  | LL at constant(s) only | -9433.88 | |  |  |  |  |  |  |  |
|  |  | McFadden's pseudo-R² | 0.3309 | |  |  |  |  |  |  |  |
|  |  | Ben-Akiva-Lerman's pseudo-R² | 0.7095 | |  |  |  |  |  |  |  |
|  |  | AIC/*n* | 1.3458 | |  |  |  |  |  |  |  |
|  |  | BIC/*n* | 1.4724 | |  |  |  |  |  |  |  |
|  |  | *n* (observations) | 9633 | |  |  |  |  |  |  |  |
|  |  | *r* (respondents) | 803 | |  |  |  |  |  |  |  |
|  |  | *k* (parameters) | 170 | |  |  |  |  |  |  |  |
|  |  |  |  |  |  |  |  |  |  |  |  |
|  |  | Estimation method | weighted simulated maximum likelihood | | | |  |  |  |  |  |
|  |  | Simulation with | 1000 Sobol draws with random linear scramble and random digital shift (skip = 1; leap = 0) | | | | | | | | |
|  |  | Optimization method | quasi-newton | |  |  |  |  |  |  |  |
|  |  | Gradient | user-supplied. analytical | | |  |  |  |  |  |  |
|  |  | Hessian | off. retained from optimization | | | |  |  |  |  |  |
|  |  |  |  |  |  |  |  |  |  |  |  |
|  |  |  |  |  |  |  |  |  |  |  |  |
|  |  |  |  |  |  |  |  |  |  |  |  |
|  |  |  |  |  |  |  |  |  |  |  |  |
|  |  |  |  |  |  |  |  |  |  |  |  |
|  |  |  |  |  |  |  |  |  |  |  |  |
|  |  |  |  |  |  |  |  |  |  |  |  |

| **Scotland (SCO)** | |  |  |  |  |  |  |  |  |  |  |
| --- | --- | --- | --- | --- | --- | --- | --- | --- | --- | --- | --- |
|  |  | MMNL | in WTP-space | |  |  |  |  |  |  |  |
|  |  |  |  | Means |  |  |  | Standard Deviations | |  |  |
|  |  | var. | dist. | coef. | sign. | st.err. | p-value | coef. | sign. | st.err. | p-value |
|  |  | ASC - last visited forest | n | 3.6222 | *** | 0.0321 | 0.0000 | 5.2495 | *** | 0.0470 | 0.0000 |
|  |  | Monoculture broadleaf (vs. mono. conif.) | n | -0.7917 | *** | 0.0622 | 0.0000 | 0.5190 | *** | 0.0759 | 0.0000 |
|  |  | 2 species conif. (vs. mono. conif.) | n | -1.2441 | *** | 0.0591 | 0.0000 | 1.6907 | *** | 0.0591 | 0.0000 |
|  |  | 2 species broad. (vs. mono. conif.) | n | 0.2461 | *** | 0.0580 | 0.0000 | 1.2434 | *** | 0.0533 | 0.0000 |
|  |  | 2 species mix. (vs. mono. conif.) | n | -0.0432 |  | 0.0580 | 0.4558 | 0.6560 | *** | 0.0418 | 0.0000 |
|  |  | 3 species mix. (vs. mono. conif.) | n | 0.8353 | *** | 0.0631 | 0.0000 | 1.0317 | *** | 0.0340 | 0.0000 |
|  |  | 4 species mix. (vs. mono. conif.) | n | 1.0768 | *** | 0.0650 | 0.0000 | 1.5467 | *** | 0.0416 | 0.0000 |
|  |  | Tree height 18 (vs. 8) | n | 0.7271 | *** | 0.1036 | 0.0000 | 1.6251 | *** | 0.0553 | 0.0000 |
|  |  | Tree height 24 (vs. 8) | n | 2.4004 | *** | 0.1079 | 0.0000 | 1.2395 | *** | 0.0589 | 0.0000 |
|  |  | Two-aged vs. single aged | n | -0.0853 |  | 0.1009 | 0.3976 | 1.3030 | *** | 0.0528 | 0.0000 |
|  |  | Multi-aged vs. single aged | n | 0.8469 | *** | 0.0906 | 0.0000 | 1.4129 | *** | 0.0540 | 0.0000 |
|  |  | Medium vs. low amount of deadwood | n | 0.2122 | *** | 0.0786 | 0.0069 | 0.8100 | *** | 0.0229 | 0.0000 |
|  |  | High vs. low amount of deadwood | n | 0.3730 | *** | 0.0825 | 0.0000 | 1.0690 | *** | 0.0271 | 0.0000 |
|  |  | Picnic vs. no facilities | n | -0.4130 | *** | 0.1366 | 0.0025 | 1.9561 | *** | 0.0495 | 0.0000 |
|  |  | Trails vs. no facilities | n | 1.0842 | *** | 0.1009 | 0.0000 | 2.1408 | *** | 0.0359 | 0.0000 |
|  |  | Picnic and trails vs. no facilities | n | 2.0990 | *** | 0.0910 | 0.0000 | 2.5812 | *** | 0.0442 | 0.0000 |
|  |  | - Distance (10 km) | l | 0.8842 | *** | 0.1072 | 0.0000 | 3.0177 | *** | 0.1827 | 0.0000 |
|  |  |  |  |  |  |  |  |  |  |  |  |
|  |  | Model diagnostics |  |  |  |  |  |  |  |  |  |
|  |  | LL at convergence | -5517.17 | |  |  |  |  |  |  |  |
|  |  | LL at constant(s) only | -8579.39 | |  |  |  |  |  |  |  |
|  |  | McFadden's pseudo-R² | 0.3569 | |  |  |  |  |  |  |  |
|  |  | Ben-Akiva-Lerman's pseudo-R² | 0.7696 | |  |  |  |  |  |  |  |
|  |  | AIC/*n* | 1.0895 | |  |  |  |  |  |  |  |
|  |  | BIC/*n* | 1.2076 | |  |  |  |  |  |  |  |
|  |  | *n* (observations) | 10440 | |  |  |  |  |  |  |  |
|  |  | *r* (respondents) | 870 | |  |  |  |  |  |  |  |
|  |  | *k* (parameters) | 170 | |  |  |  |  |  |  |  |
|  |  |  |  |  |  |  |  |  |  |  |  |
|  |  | Estimation method | weighted simulated maximum likelihood | | | |  |  |  |  |  |
|  |  | Simulation with | 1000 Sobol draws with random linear scramble and random digital shift (skip = 1; leap = 0) | | | | | | | | |
|  |  | Optimization method | quasi-newton | |  |  |  |  |  |  |  |
|  |  | Gradient | user-supplied. analytical | | |  |  |  |  |  |  |
|  |  | Hessian | off. retained from optimization | | | |  |  |  |  |  |

**Table S 8. TCM results**

Weekend trips

| Travel Cost | -0.0494 | 0.0085 | -0.5587 | 0.0942 | -0.0678 | 0.0124 | -0.1300 | 0.0209 | -0.0461 | 0.0079 | -0.0726 | 0.0109 | -0.0474 | 0.0084 | -0.1377 | 0.0175 | -0.1280 | 0.0134 | -0.0711 | 0.0082 |
| --- | --- | --- | --- | --- | --- | --- | --- | --- | --- | --- | --- | --- | --- | --- | --- | --- | --- | --- | --- | --- |
| Constant | 2.2597 | 0.1197 | 0.4314 | 0.4070 | 2.4598 | 0.0886 | 1.9677 | 0.1630 | 2.1538 | 0.1882 | 1.6714 | 0.2853 | 0.5350 | 0.6374 | 2.2133 | 0.1137 | 1.9210 | 0.1689 | 1.3305 | 0.2039 |
| alpha | 2.6430 | 0.5080 | 4.5655 | 2.6061 | 1.9062 | 0.2790 | 3.5572 | 0.8762 | 4.9684 | 1.3272 | 5.9158 | 2.2961 | 11.6984 | 8.8105 | 2.5242 | 0.4585 | 3.8950 | 0.9890 | 2.7234 | 0.8860 |
| LL | -1224.11 |  | -666.689 |  | -1294.1 |  | -1148.7 |  | -1432.09 |  | -1037.41 |  | -1093.91 |  | -1325.7 |  | -1254.19 |  | -725.925 |  |
| N | 371 |  | 351 |  | 375 |  | 371 |  | 421 |  | 346 |  | 433 |  | 421 |  | 418 |  | 327 |  |
| LR | 23.46 |  | 32.5 |  | 21.68 |  | 27.94 |  | 22.37 |  | 30.1 |  | 24.54 |  | 44.32 |  | 61.29 |  | 60.91 |  |
|  |  |  |  |  |  |  |  |  |  |  |  |  |  |  |  |  |  |  |  |  |
|  |  |  |  |  |  |  |  |  |  |  |  |  |  |  |  |  |  |  |  |  |
| **CS** | **20.26** | **3.50** | **1.79** | **0.30** | **14.74** | **2.69** | **7.69** | **1.23** | **21.71** | **3.71** | **13.78** | **2.06** | **21.09** | **3.73** | **7.26** | **0.92** | **7.81** | **0.82** | **14.07** | **1.62** |

Weekday trips

| Cost | -0.1451 | 0.0302 | -1.1547 | 0.3124 | -0.2440 | 0.0508 | -0.5187 | 0.0832 | -0.3792 | 0.0513 | -0.2782 | 0.0407 | -0.1566 | 0.0227 | -0.4025 | 0.0923 | -0.1895 | 0.0869 | -0.1451 | 0.0166 |
| --- | --- | --- | --- | --- | --- | --- | --- | --- | --- | --- | --- | --- | --- | --- | --- | --- | --- | --- | --- | --- |
| Constant | 3.4102 | 0.1273 | 1.6308 | 0.4398 | 3.9420 | 0.1339 | 3.3493 | 0.1845 | 3.5705 | 0.2705 | 3.6029 | 0.1595 | 2.3949 | 0.2226 | 2.8997 | 0.2132 | 2.5719 | 0.2964 | 2.2599 | 0.2822 |
| alpha | 2.2067 | 0.4117 | 3.1484 | 2.2693 | 3.2180 | 0.5775 | 3.0682 | 0.7989 | 5.7230 | 2.1131 | 4.0569 | 0.8924 | 3.6274 | 1.2015 | 3.8367 | 1.1844 | 5.3235 | 2.1801 | 4.8349 | 1.9242 |
| LL | -776.71 |  | -155.884 |  | -1184.33 |  | -609.884 |  | -702.432 |  | -1189.67 |  | -617.239 |  | -629.972 |  | -596.846 |  | -690.216 |  |
| N | 182 |  | 62 |  | 250 |  | 152 |  | 164 |  | 273 |  | 190 |  | 164 |  | 158 |  | 227 |  |
| LR | 15.28 |  | 12.09 |  | 15.51 |  | 24.58 |  | 26.19 |  | 29.03 |  | 30.41 |  | 12.62 |  | 3.81 |  | 49.11 |  |
|  |  |  |  |  |  |  |  |  |  |  |  |  |  |  |  |  |  |  |  |  |
|  |  |  |  |  |  |  |  |  |  |  |  |  |  |  |  |  |  |  |  |  |
| **CS** | **6.89** | **1.43** | **0.87** | **0.23** | **4.10** | **0.85** | **1.93** | **0.31** | **2.64** | **0.36** | **3.59** | **0.53** | **6.39** | **0.92** | **2.48** | **0.57** | **5.28** | **2.42** | **6.89** | **0.79** |
